# Supplementary material
Source: PubMed Central journal article supplement (PMC10841356)

Tree scale: 0.1

A)

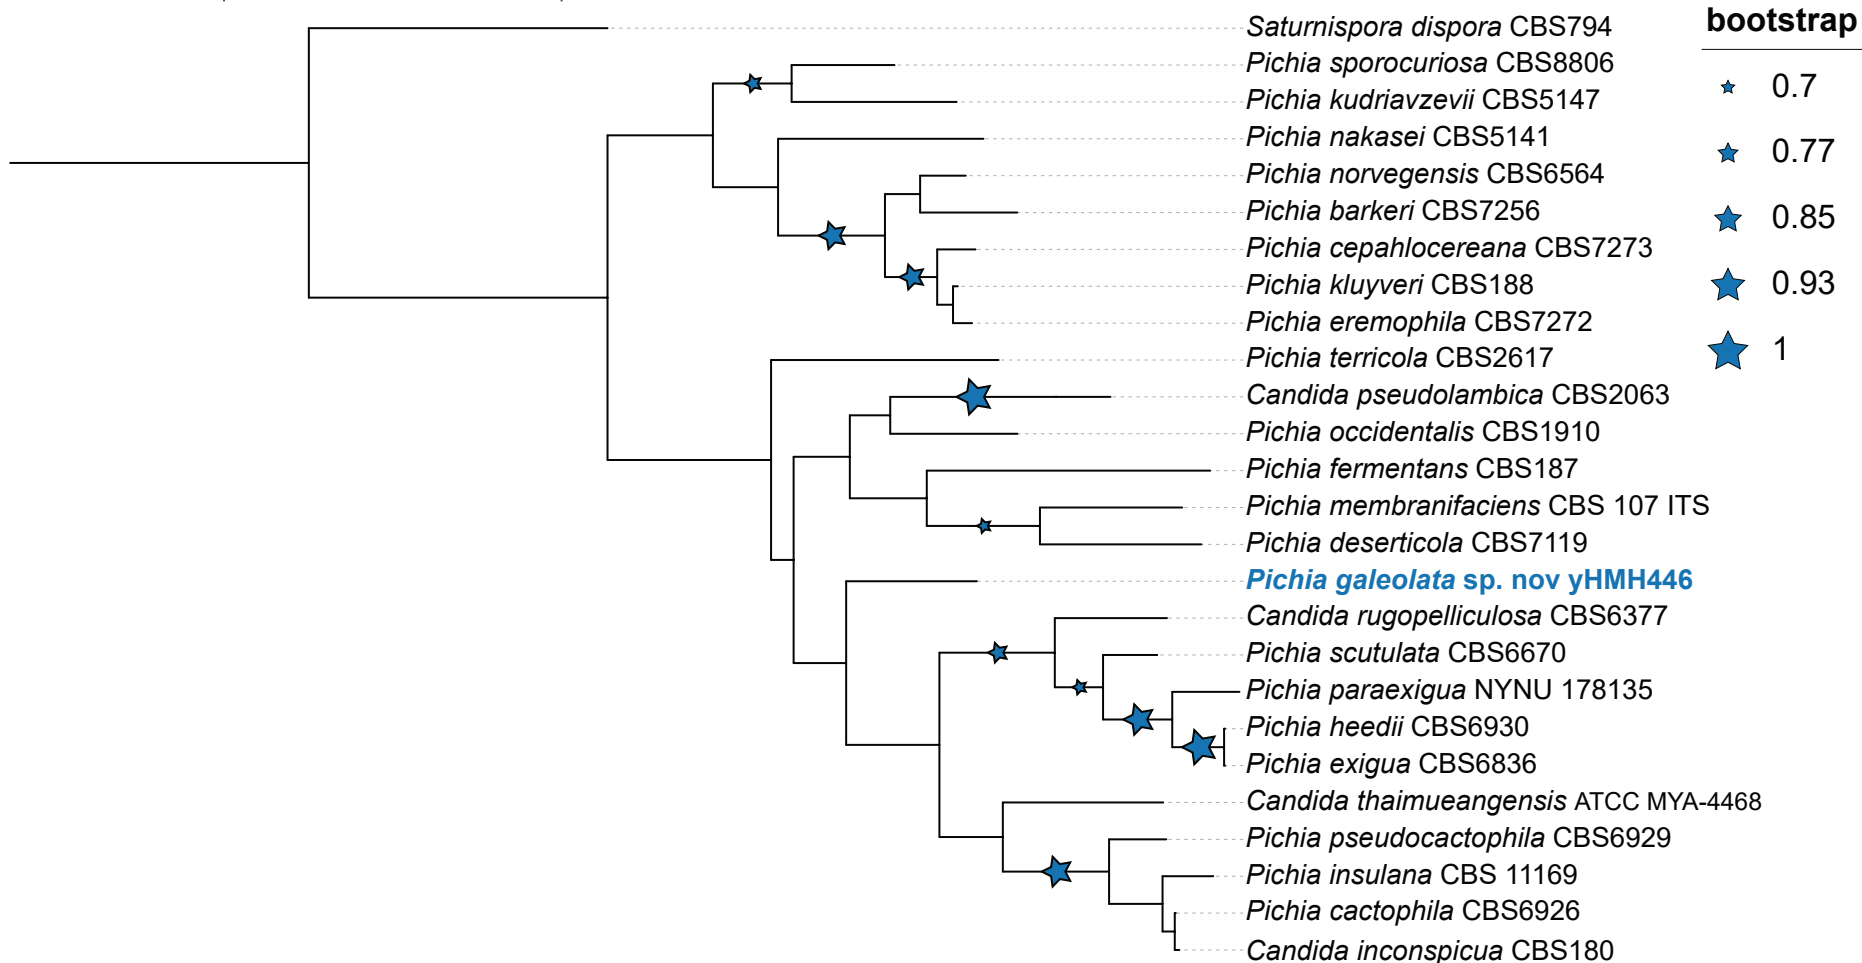

B)

Tree scale: 0.1

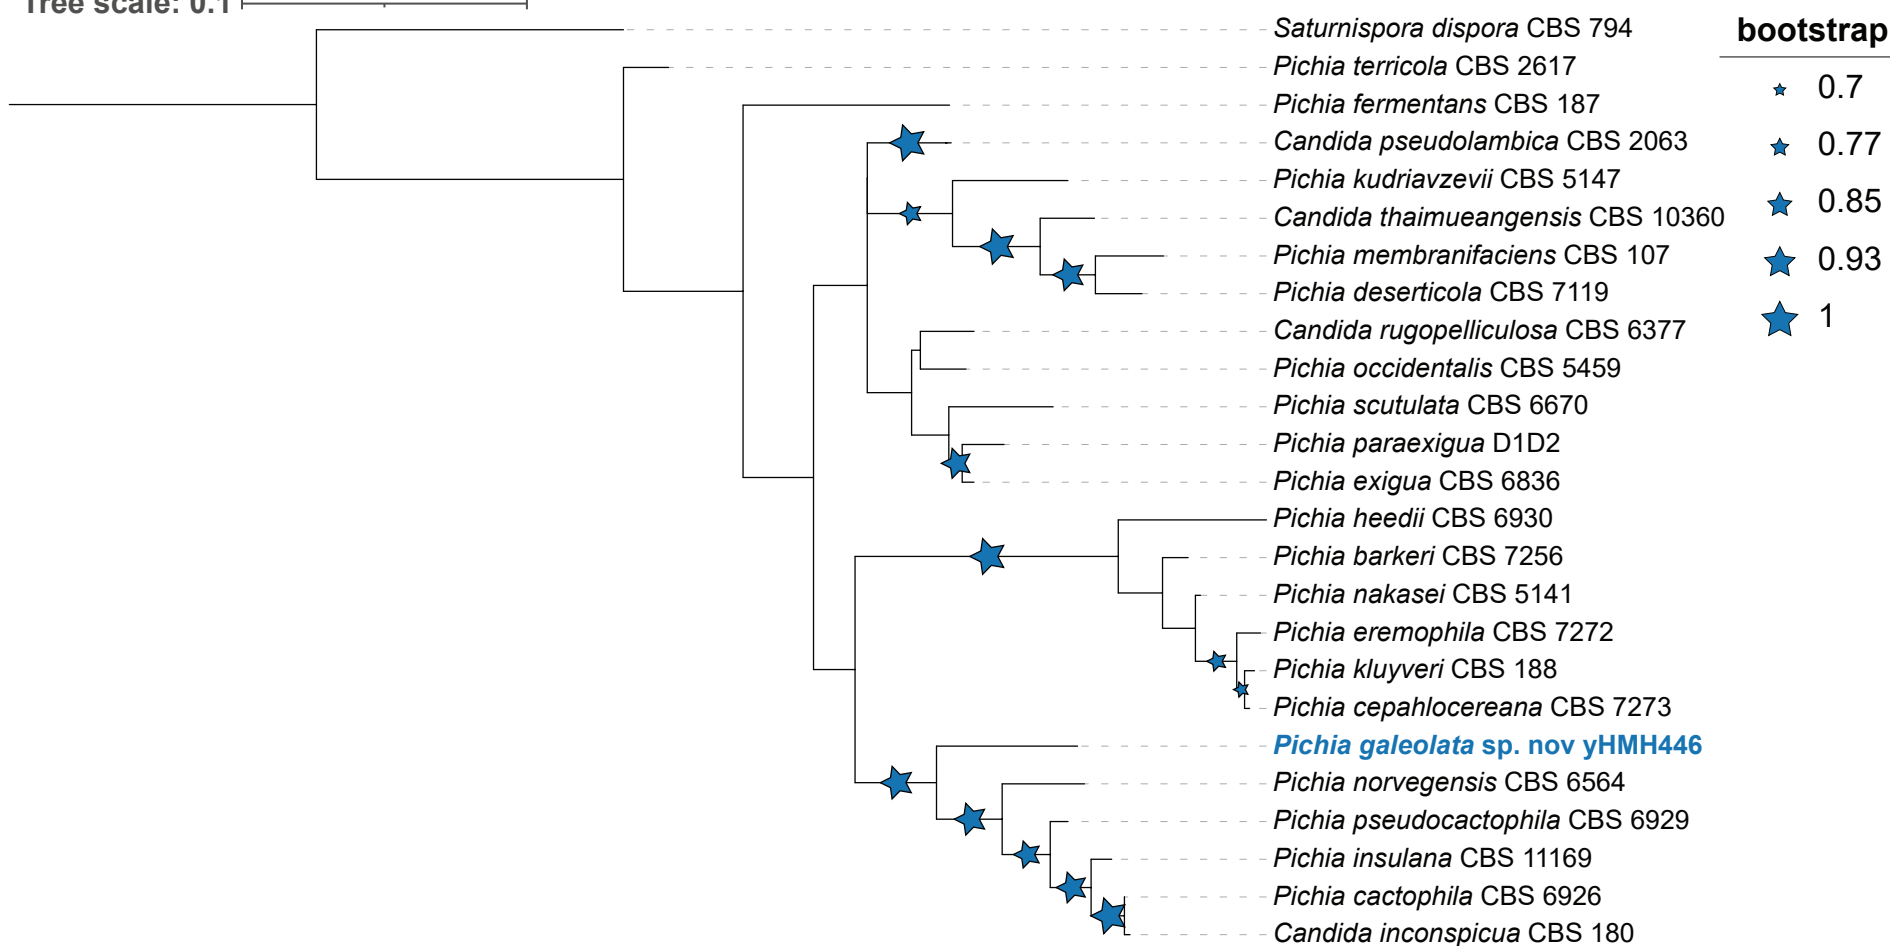

Supplement: NIHMS1938832-supplement-Supinfo2.pdf [file NIHMS1938832-supplement-Supinfo2.pdf]
